# Supplementary material for: Cryo-EM structures of Smc5/6 in multiple states reveal its assembly and functional mechanisms
Source: Springer Nature journal article supplement (doi:10.1038/s41594-024-01319-1), 2024-06-18
Supplement: 41594_2024_1319_MOESM1_ESM.pdf [file 41594_2024_1319_MOESM1_ESM.pdf]

# **Cryo-EM structures of Smc5/6 in multiple states reveal its assembly and functional mechanisms**

---

In the format provided by the authors and unedited

---

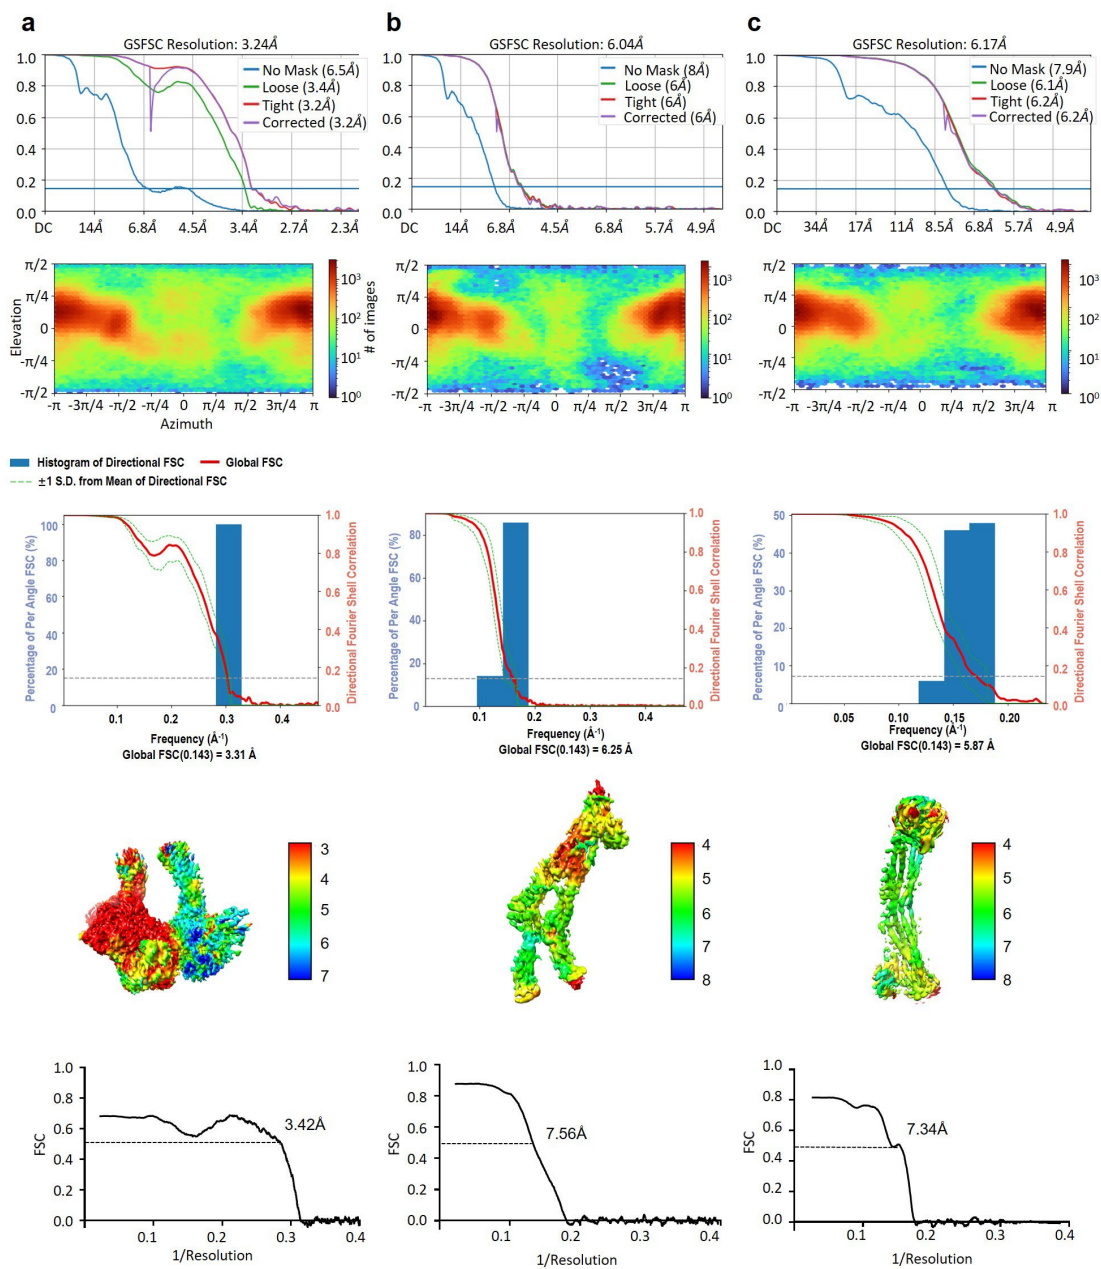

**Supplementary Fig. 1 Resolution assessment of the cryo-EM maps of Smc5/6-8mer.**

(a-c) Global Fourier Shell Correlation (FSC) curve, angular distribution plot, 3D FSC curve, local resolution estimation, and model vs. map FSC of the focused refinement maps of the Head (a), Arm (b), and Hinge (c) regions of Smc5/6-8mer are displayed from top to bottom.

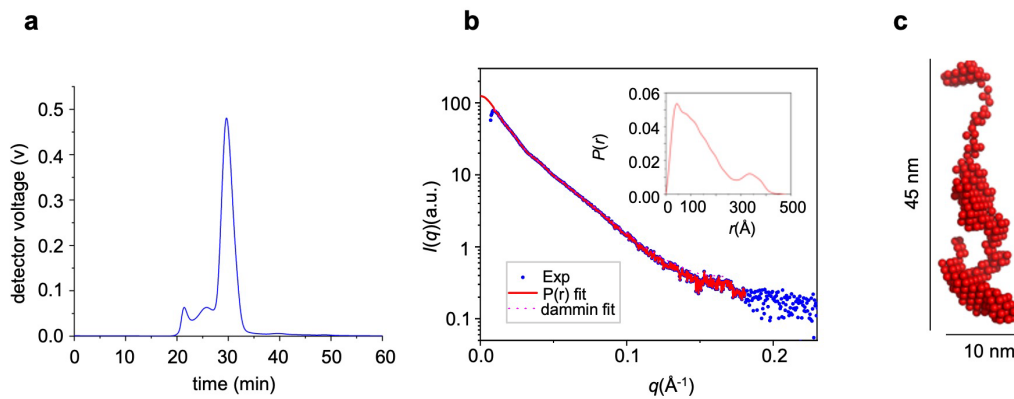

**Supplementary Fig. 2 SEC-SAXS data of the Smc5/6-8mer complex.**

(a) A SEC elution profile of the Smc5/6-8mer complex.

(b) A SAXS scattering profile of the Smc5/6-8mer complex. The back-calculated scattering profile of the *Ab initio* model (pink dash line) and atomic model (red line) were fitted to the experimental SAXS data (blue dot line). The inset shows the Pair distance distribution function  $P(r)$  curve.

(c) A low-resolution bead model calculated by DAMMIF based on the SAXS data.

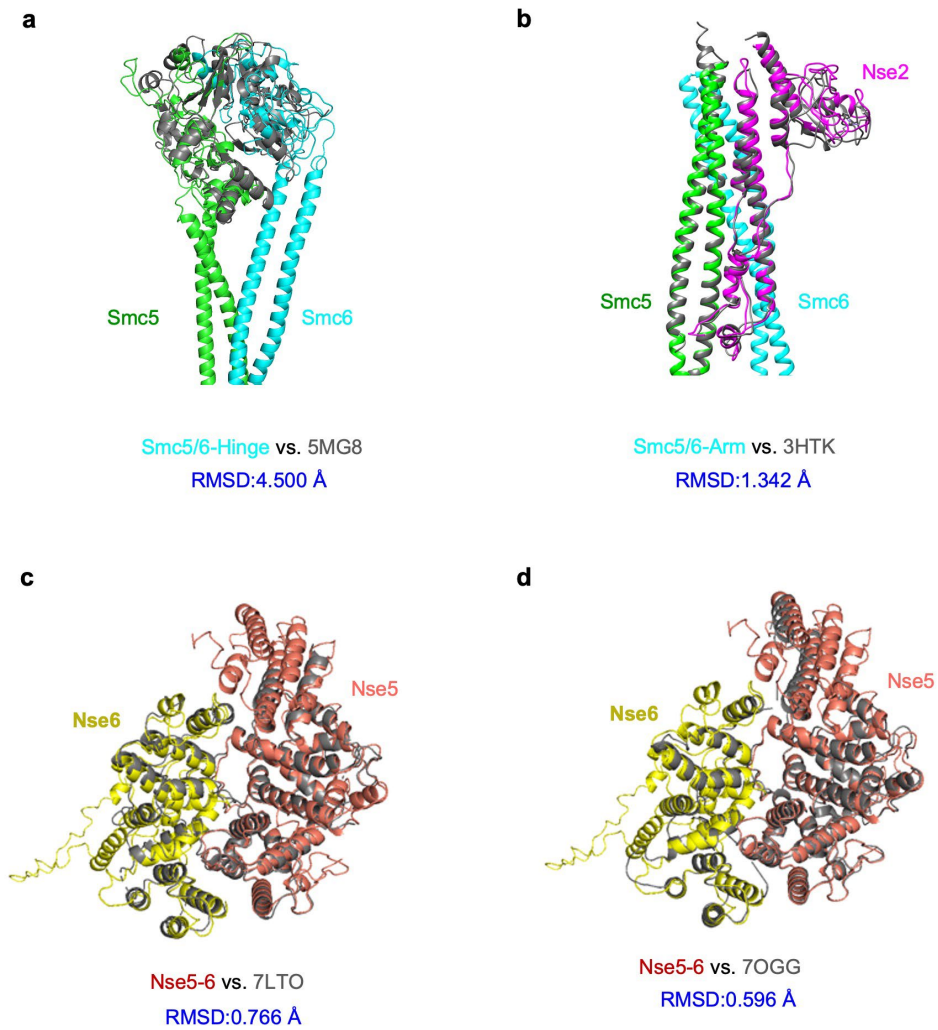

**Supplementary Fig. 3 Comparison of the Smc5/6-8mer structure with published subcomplex structures.**

(a) The published Smc5-6-Hinge structure (grey, PDB: 5MG8) from *Schizosaccharomyces pombe* was aligned to Smc5/6-8mer hinge structure.

(b) The published Nse2-Smc6 structure (grey, PDB: 3HTK) was aligned to the Smc5/6-8mer Arm structure (color).

(c-d) The compact regions of Nse5/6 (colored) from Smc5/6-8mer were aligned with the Nse5/6 subcomplex structures (grey, PDB: 7LTO (c); PDB: 7OGG(d)).

The RMSD value of each alignment is listed below each panel.

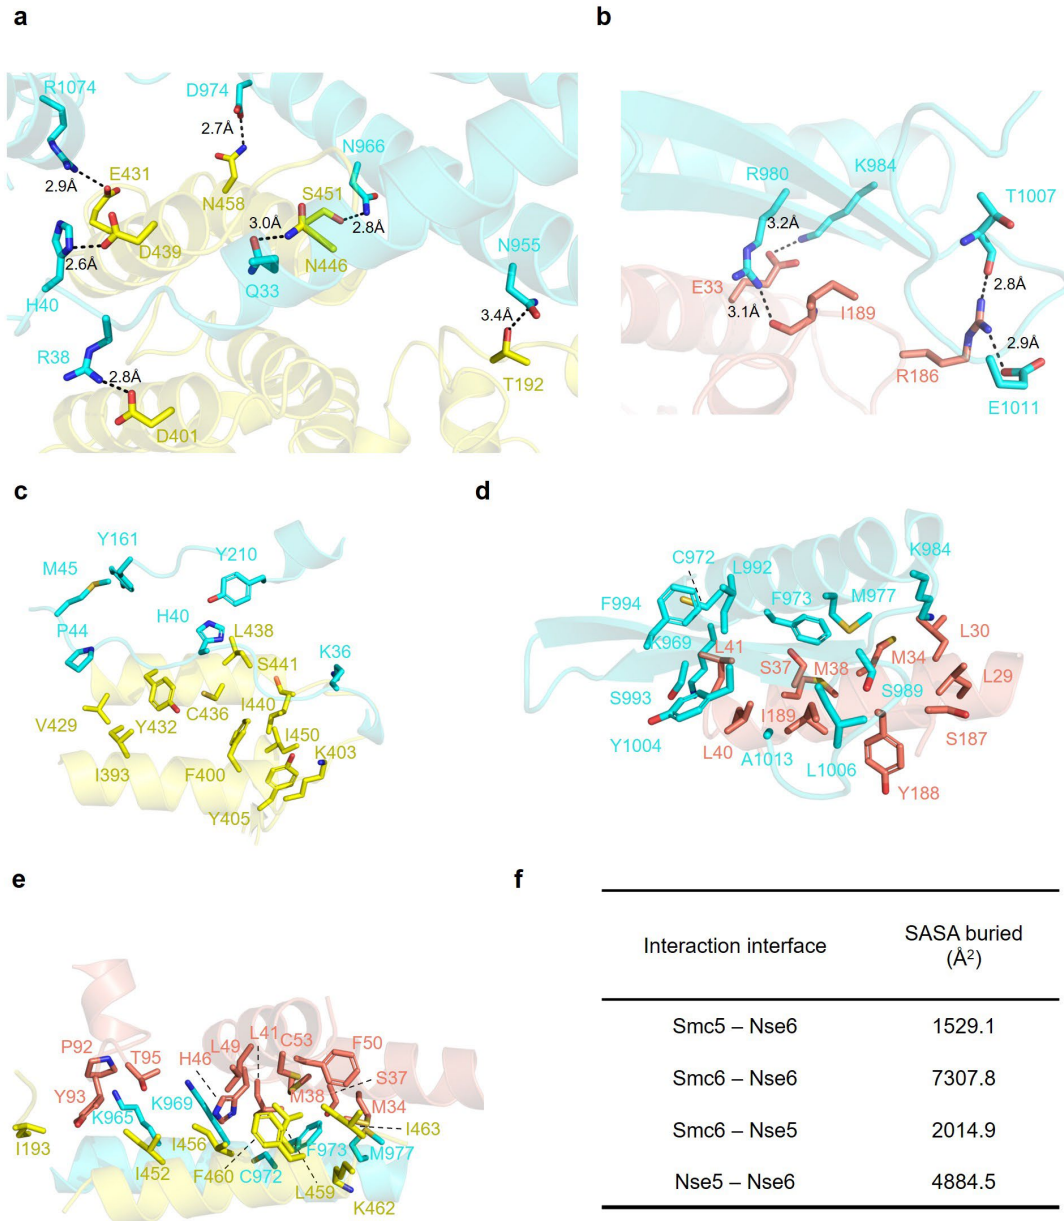

**Supplementary Fig. 4 Interactions between Nse5-6 and the head regions of Smc5-6.**

(a-b) Hydrogen bonds and salt bridges formed amongst the pairs of the subunits.

(c-e) Hydrophobic core interactions among the two pairs of subunits.

(f) Solvent accessible surface area (SASA) buried at the interface formed among indicated pairs of subunits. Sidechains of key residues are indicated as sticks.

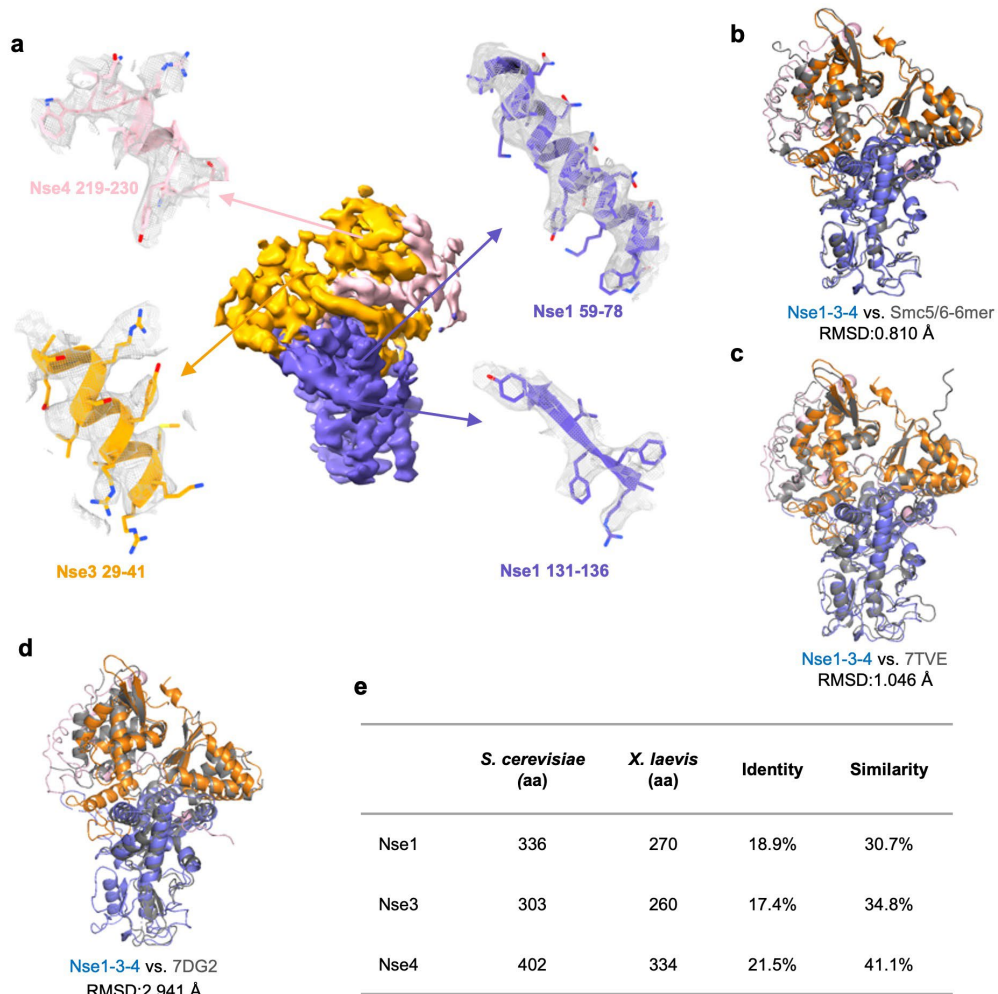

**Supplementary Fig. 5 Local density maps and structural comparison of the Nse1-3-4 heterotrimer.**

(a) Representative local cryo-EM density maps of the Nse1-3-4 structure described in this work.

(b-d) Structural comparison of the Nse1-3-4 heterotrimer. The budding yeast Nse1-3-4 trimer structure obtained in this work (color) was aligned with the structure of the same subcomplex extracted from Smc5/6-6mer structure described in this work (grey) (b), with another budding yeast Nse1-3-4 structure (PDB: 7TVE, grey) (c), and with the *X. laevis* Nse1-3-4 structure (PDB: 7DG2, grey) (d).

(e) Indicated protein properties of the Nse1, Nse3, and Nse4 proteins from *S. cerevisiae* and *X. laevis* are compared.

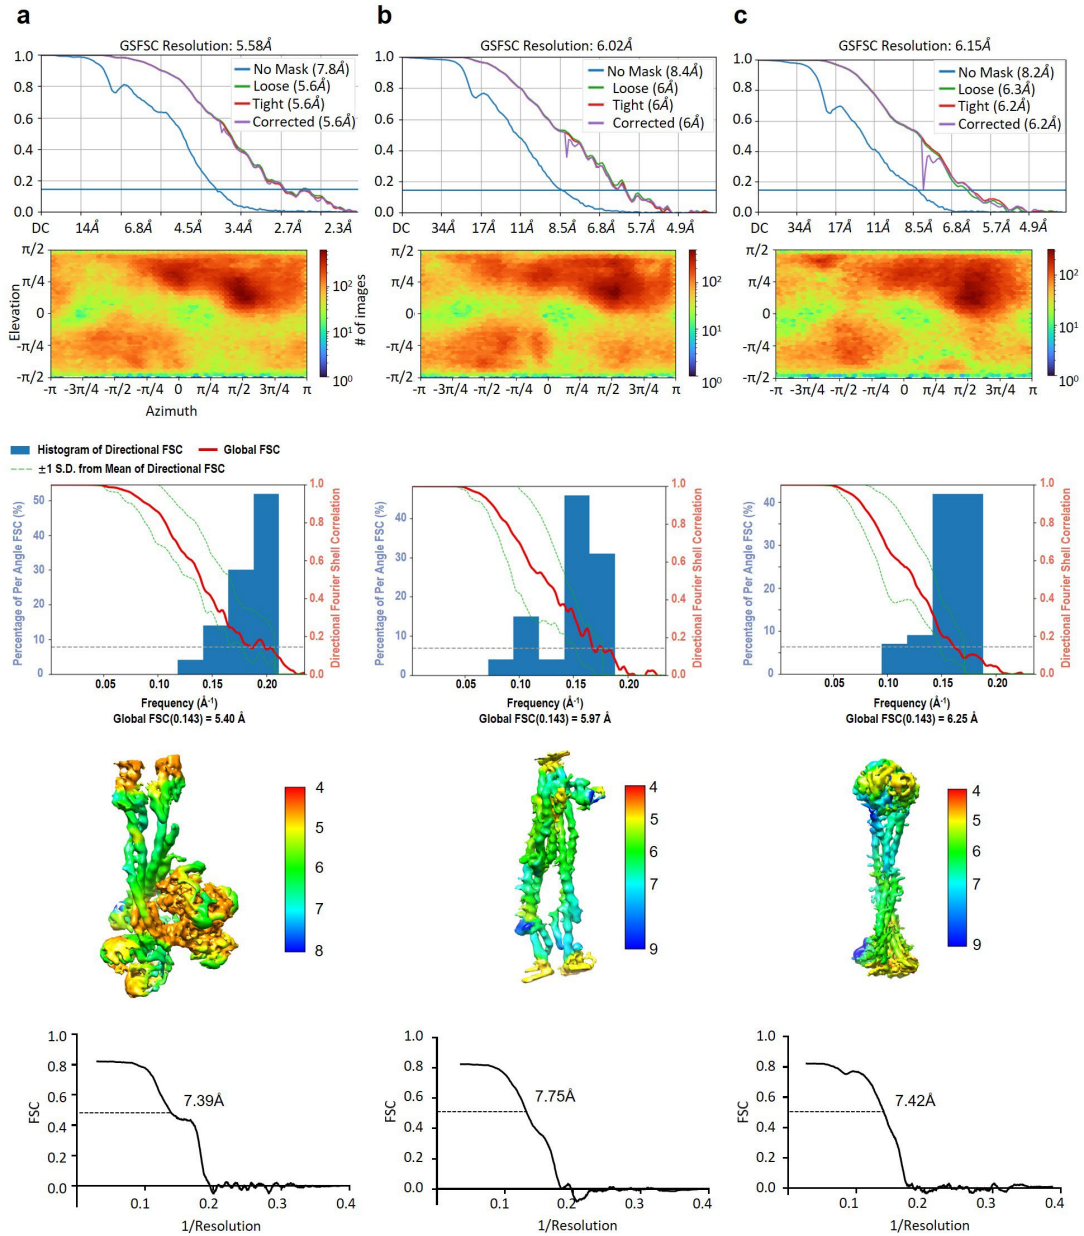

**Supplementary Fig. 6 Resolution assessment of the cryo-EM maps of Smc5/6-6mer.**  
 (a-c) Global Fourier Shell Correlation (FSC) curve, angular distribution plot, 3D FSC curve, local resolution estimation, and model vs. map FSC of the focused refinement maps of the Head (a), Arm (b), and Hinge (c) regions of Smc5/6-6mer are displayed from top to bottom.

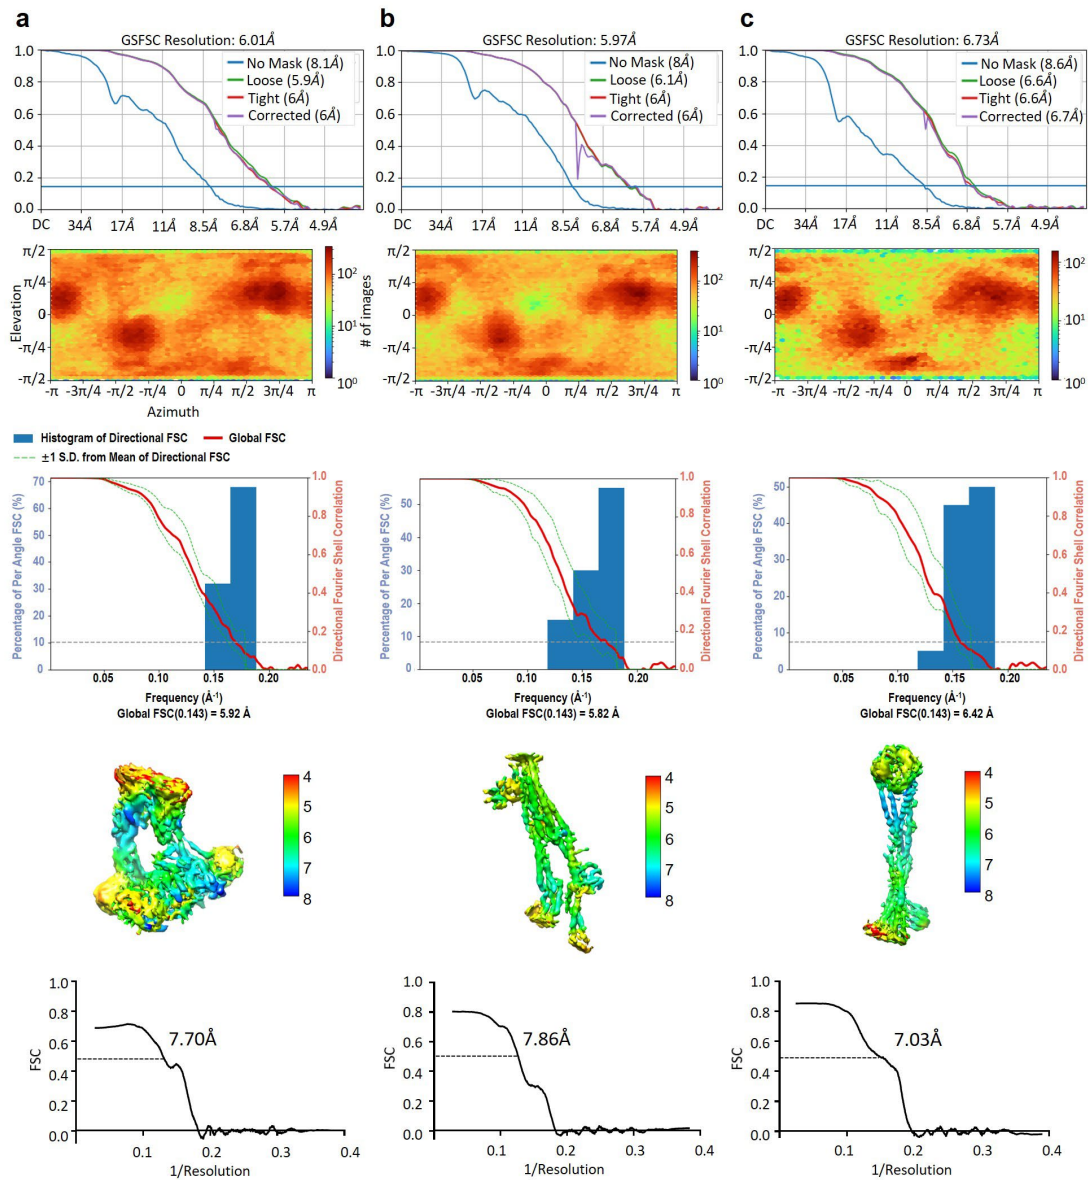

**Supplementary Fig. 7 Resolution assessment of the cryo-EM maps of Smc5/6-5mer.**  
 (a-c) Global Fourier Shell Correlation (FSC) curve, angular distribution plot, 3D FSC curve, local resolution estimation, and model vs. map FSC of the focused refinement maps of the Head (a), Arm (b), and Hinge (c) regions of Smc5/6-5mer are displayed from top to bottom.



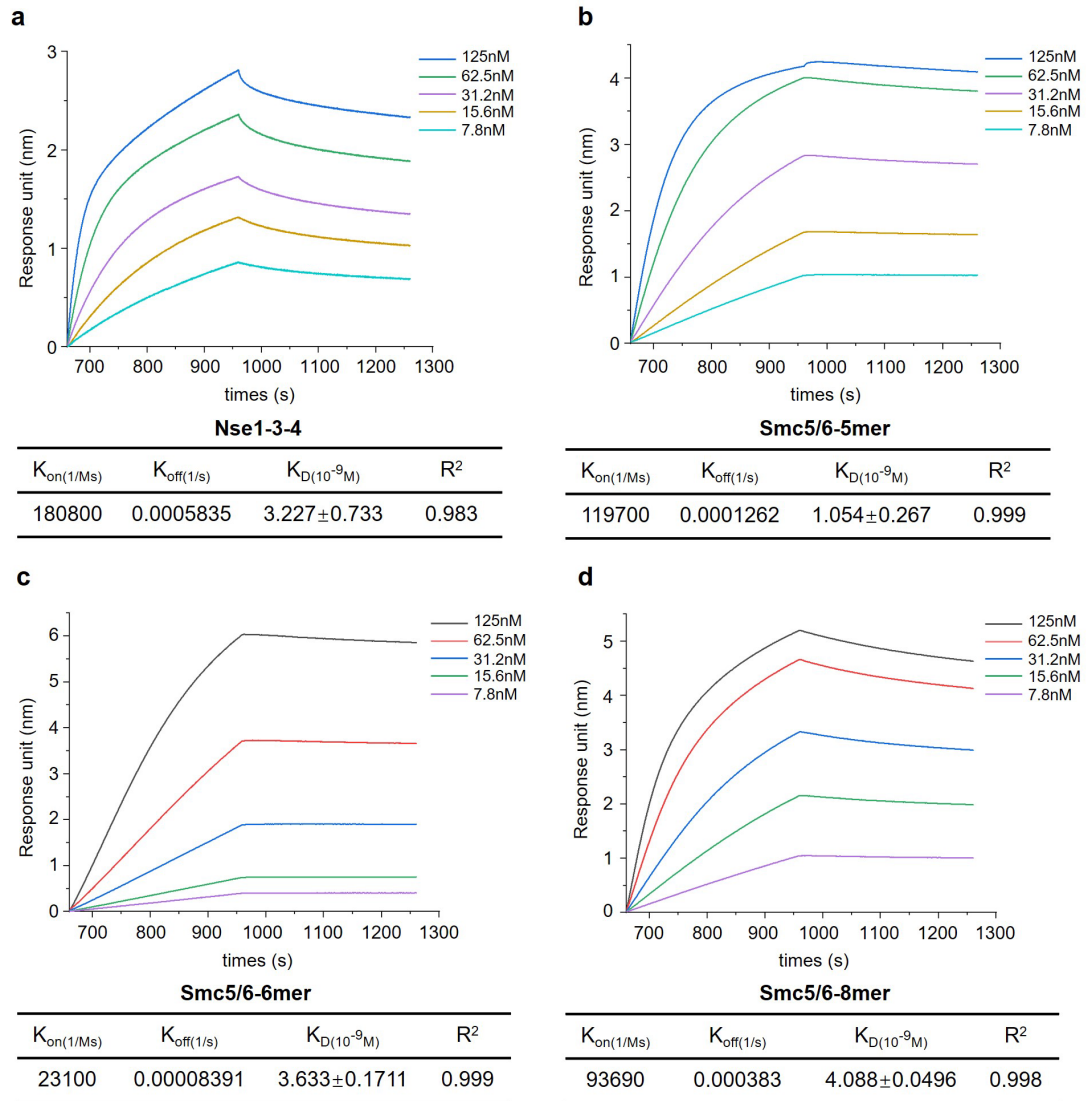

**Supplementary Fig. 8 DNA binding activity results.**

DNA binding data for purified Nse1-3-4 (a), Smc5/6-5mer (b), -6mer (c), and -8mer (d) are presented for the association with 30 bp dsDNA using Octet RED 96.

**Supplementary Table 1. SAXS data collection parameters for Smc5/6-8mer.**

| <b>(a) Sample details</b>                                                                        |                                                                              |                   |
|--------------------------------------------------------------------------------------------------|------------------------------------------------------------------------------|-------------------|
|                                                                                                  | <b>Smc5/6-8mer</b>                                                           |                   |
| Organism                                                                                         | <i>Saccharomyces cerevisiae</i> (strain ATCC 204508 / S288c) (Baker's yeast) |                   |
| Source (Catalogue No. or reference)                                                              | Spodoptera frugiperda Sf9 cells expressed                                    |                   |
| Description: sequence (including Uniprot ID + uncleaved tags), bound ligands/modifications, etc. | Q08204, Q12749, P38632, P40026, Q03718, Q07913, Q05541, P43124               |                   |
| Extinction coefficient $\epsilon$ (wavelength and units)                                         | 0.610                                                                        |                   |
| Molecular mass M from chemical composition (Da)                                                  | 520478.92                                                                    |                   |
| loading volume/concentration, (mg ml <sup>-1</sup> )                                             | 10                                                                           |                   |
| injection volume ( $\mu$ l)                                                                      | 100                                                                          |                   |
| flow rate (ml min <sup>-1</sup> )                                                                | 0.4                                                                          |                   |
| Concentration measure method                                                                     | UV                                                                           |                   |
| Solvent composition and source                                                                   | 20 mM HEPES-NaOH, pH 8.0, 300 mM NaCl                                        |                   |
| <b>(b) SAXS data collection parameters</b>                                                       |                                                                              |                   |
| Source, instrument and description or reference                                                  | BL19U2 beamline at SSRF                                                      |                   |
| Wavelength ( $\text{\AA}$ )                                                                      | 1.033                                                                        |                   |
| Sample-to-detector distance                                                                      | 2.2 m                                                                        |                   |
| q-measurement range ( $\text{\AA}^{-1}$ )                                                        | 0.007-0.45                                                                   |                   |
| Exposure time                                                                                    | 1.5 s                                                                        |                   |
| number of exposures                                                                              | 2000                                                                         |                   |
| Sample configuration including path length                                                       | 1.5 mm                                                                       |                   |
| Sample temperature ( $^{\circ}\text{C}$ )                                                        | 23                                                                           |                   |
| <b>(c) Software employed for SAXS data reduction, analysis and interpretation</b>                |                                                                              |                   |
| SAXS data reduction to sample-solvent scattering                                                 | RAW                                                                          |                   |
| Guinier                                                                                          | AutoRG (ATSAS)                                                               |                   |
| $P(r)$                                                                                           | GNOM                                                                         |                   |
| Scattering particle volume                                                                       | RAW                                                                          |                   |
| Shape/bead modelling                                                                             | DAMMIF                                                                       |                   |
| Molecular graphics                                                                               | PyMOL                                                                        |                   |
| <b>(d) Structural Parameters</b>                                                                 |                                                                              |                   |
|                                                                                                  | I(0) (cm <sup>-1</sup> )                                                     | 120.03 $\pm$ 2.71 |
| From Guinier fit                                                                                 | Rg ( $\text{\AA}$ )                                                          | 122.92 $\pm$ 2.46 |
|                                                                                                  | I(0) (cm <sup>-1</sup> )                                                     | 121.4 $\pm$ 4.5   |
| From $P(r)$                                                                                      | Rg ( $\text{\AA}$ )                                                          | 122.1 $\pm$ 4.4   |
|                                                                                                  | Dmax ( $\text{\AA}$ )                                                        | 480.0             |
| MW (kDa) from sequence                                                                           | 520.5                                                                        |                   |
| From volumn of correlation ( $V_c$ )                                                             | 444.9                                                                        |                   |
| Using the porod volumn ( $V_p$ )                                                                 | 403.8                                                                        |                   |
| Modeling                                                                                         |                                                                              |                   |
|                                                                                                  | $\chi^2$                                                                     | 1.023             |
| DAMMIN                                                                                           | NSD                                                                          | 0.910 $\pm$ 0.029 |
|                                                                                                  | Ensemble Resolution                                                          | 66 $\pm$ 5        |

**Supplementary Table 2.** Primers used in this study.

| Primer # | Purpose                                              | Direction | Primer sequence                                       |
|----------|------------------------------------------------------|-----------|-------------------------------------------------------|
| 1        | To PCR <i>Nse1</i> and assemble into 9A vector       | forward   | TTAAGAAGGAGATATAGATCATGGAGGTACATGAAGAGCA              |
| 2        |                                                      | reverse   | TTATGGAGTTGGGATCTTATTATTAATAACGTATACGCCCTCT           |
| 3        | To PCR <i>Nse3</i> and assemble into 9C vector       | forward   | TACTTCCAATCCAATGCAATGAGTTCTATAGATAATGACAGC            |
| 4        |                                                      | reverse   | TTATCCACTTCCAATGTTATTATATAGAATATGAATCGCCAATGCT        |
| 5        | To PCR <i>Nse4</i> and assemble into 9C vector       | forward   | TACTTCCAATCCAATGCAATGTCTAGTACAGTAATATCTAGAA           |
| 6        |                                                      | reverse   | TTATCCACTTCCAATGTTATTAGTCTAAGAATGGTGAAGTGAT           |
| 7        | To PCR <i>Nse1</i> and assemble into 438-A vector    | forward   | TACTTCCAATCCAATCGATGGAGGTACATGAAGAGCA                 |
| 8        |                                                      | reverse   | TTATCCACTTCCAATGTTATTAATAACGTATACGCCCTCTG             |
| 9        | To PCR <i>Nse2</i> and assemble into 438-A vector    | forward   | TACTTCCAATCCAATCGATGGCCTTGAACGATAATCC                 |
| 10       |                                                      | reverse   | TTATCCACTTCCAATGTTATTATAAAACATCGATGGCTTGACTA          |
| 11       | To PCR <i>Nse3</i> and assemble into 438-A vector    | forward   | TACTTCCAATCCAATCGATGAGTTCTATAGATAATGACAGC             |
| 12       |                                                      | reverse   | TTATCCACTTCCAATGTTATTATATAGAATATGAATCGCCAATGCT        |
| 13       | To PCR <i>Nse4</i> and assemble into 438-A vector    | forward   | TACTTCCAATCCAATCGATGTCTAGTACAGTAATATCTAGAA            |
| 14       |                                                      | reverse   | TTATCCACTTCCAATGTTATTAGTCTAAGAATGGTGAAGTGAT           |
| 15       | To PCR <i>Nse5</i> and assemble into 438-A vector    | forward   | TACTTCCAATCCAATCGATGGATGGTGCCTTGATAAATT               |
| 16       |                                                      | reverse   | TTATCCACTTCCAATGTTATTATTCTATAATTACTTTTATCATGAACG      |
| 17       | To PCR <i>Nse6</i> and assemble into 438-A vector    | forward   | TACTTCCAATCCAATCGATGGGAAGCGTGAACTCAT                  |
| 18       |                                                      | reverse   | TTATCCACTTCCAATGTTATTACCTGATTTTAGAAAACAAATTTAATATTCC  |
| 19       | To PCR <i>Smc5</i> and assemble into 438-A vector    | forward   | TACTTCCAATCCAATCGATGACCAGTCTAATAGATTTGG               |
| 20       |                                                      | reverse   | TTATCCACTTCCAATGTTATTAATCGAATGAGTAGTTAGAAGTTTC        |
| 21       | To PCR <i>Smc6</i> and assemble into 438-C vector    | forward   | TACTTCCAATCCAATGCAATGATTTGACTACGATTAGTG               |
| 22       |                                                      | reverse   | TTATCCACTTCCAATGTTATTAATTATAAAAAATTGGAATTATTCTGTCTCTC |
| 23       | To PCR <i>nse2-3A</i> fragment                       | forward   | GTAATACCGGATCTGCAAAACCCCGCAGACG                       |
| 24       |                                                      | forward   | ATGGCCTTGAACGATAATCC                                  |
| 25       |                                                      | reverse   | GCAGATCCGGTATTACACAA                                  |
| 26       | To confirm <i>nse2-3A</i>                            | forward   | CCTTTGATTCTGGTACTCC                                   |
| 27       |                                                      | reverse   | GACGGTTTGAATGTAGAGAG                                  |
| 28       | To PCR <i>nse6-RAAE</i> and <i>nse6-9A</i> fragments | forward   | GTAGCCAAAAGTGAGTTACAAAAAGCATAAAG                      |
| 29       |                                                      | forward   | ATGGGAAGCGTGAACTCATC                                  |
| 30       |                                                      | reverse   | CTCACTTTTGGCTACAGTGT                                  |
| 31       | To confirm <i>nse6-RAAE</i> and <i>nse6-9A</i>       | forward   | GTCTTCTTTGTATTTGTTTTAG                                |
| 32       |                                                      | reverse   | GAAAATATTGTTACTAAGGACC                                |

**Supplementary Table 3. Yeast strains used in this work.**

| <b>Name</b> | <b>Genotypes</b>                                                            |
|-------------|-----------------------------------------------------------------------------|
| T2271-2-7C  | <i>nse6-D86R,I88A,L89A,R91E-AID-3FLAG::KAN</i>                              |
| T2272-1-4C  | <i>nse6-D86A,P87A,I88A,L89A,K90A,R91A,T92A,I93A,I94A-AID-3FLAG::KAN</i>     |
| T2273-14-6C | <i>nse2-K20A,H23A,H26A-3HA::KAN</i>                                         |
| X8974       | <i>NSE6-AID-3FLAG::KAN SMC5-13MYC::HIS3</i>                                 |
| X8975       | <i>nse6-D86R, I88A, L89A, R91E-AID-3FLAG::KAN RAD5 SMC5-13myc::HIS3</i>     |
| X8978       | <i>NSE2-3HA::KAN SMC6-13myc::HIS</i>                                        |
| X8979       | <i>nse2-K20A,H23A,H26A-3HA::KAN SMC6-13MYC::HIS3</i>                        |
| T294        | <i>SMC5-13MYC::HIS3</i>                                                     |
| X3254       | <i>SMC6-13 MYC:HIS3</i>                                                     |
| X8981-1A    | <i>nse2-K20A,H23A,H26A-3HA::KAN nse6-D86R,I88A,L89A,R91E-AID-3FLAG::KAN</i> |
| X8984-5B    | <i>NSE2-3HA::KAN NSE6-AID-3FLAG::KAN</i>                                    |
| T1596-2-9A  | <i>mms4Δ::KAN</i>                                                           |
| X8990-10A   | <i>NSE2-3HA::KAN mms4Δ::KAN</i>                                             |
| X8982-1B    | <i>nse2-K20A,H23A,H26A-3HA::KAN mms4Δ::KAN</i>                              |
| X9037-7D    | <i>NSE6-AID-3XFLAG::KAN mms4Δ::KAN</i>                                      |
| X8991-2A    | <i>nse6-D86R,I88A,L89A,R91E-AID-3FLAG::KAN mms4Δ::KAN</i>                   |
| T766-1      | <i>esc2Δ::KAN</i>                                                           |
| X8987-6A    | <i>NSE2-3HA::KAN esc2Δ::KAN</i>                                             |
| X8983-2B    | <i>nse2-K20A,H23A,H26A-3HA::KAN esc2Δ::KAN</i>                              |
| X9038-7B    | <i>NSE6-AID-3FLAG::KAN esc2Δ::KAN</i>                                       |
| X8992-6B    | <i>nse6-D86R,I88A,L89A,R91E-AID-3FLAG::KAN esc2Δ::KAN</i>                   |
| G172        | <i>sgs1Δ::HIS3</i>                                                          |
| X8989-7A    | <i>NSE2-3HA:KAN sgs1Δ::HIS3</i>                                             |
| X8985-9A    | <i>nse2-K20A,H23A,H26A-3HA::KAN sgs1Δ::HIS3</i>                             |
| X8997-1A    | <i>NSE6-AID-3FLAG::KAN sgs1Δ::HIS3</i>                                      |
| X8980-1C    | <i>nse6-D86R,I88A,L89A,R91E-AID-3FLAG::KAN sgs1Δ::HIS3</i>                  |
| X3952-1B    | <i>rrm3Δ::KAN</i>                                                           |
| X8988-2B    | <i>NSE2-3HA::KAN rrm3Δ::KAN</i>                                             |
| X8986-2B    | <i>nse2-K20A,H23A,H26A-3HA::KAN rrm3Δ::KAN</i>                              |
| X8998-3B    | <i>NSE6-AID-3FLAG::KAN rrm3Δ::KAN</i>                                       |
| X8993-17C   | <i>nse6-D86R,I88A,L89A,R91E-AID-3FLAG::KAN rrm3Δ::KAN</i>                   |
