# Supplementary material for: Cryo-EM structures of Smc5/6 in multiple states reveal its assembly and functional mechanisms
Source: Springer Nature journal article supplement (doi:10.1038/s41594-024-01319-1), 2024-06-18
Supplement: 41594_2024_1319_MOESM8_ESM.pdf [file 41594_2024_1319_MOESM8_ESM.pdf]

**Source data for Fig3d**

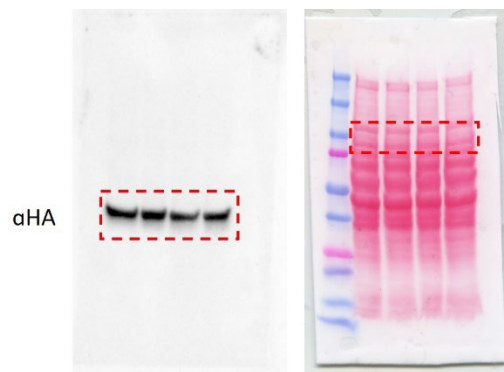

Red Rectangles Represent Area Used in Main Figures

**Source data for Fig3e**

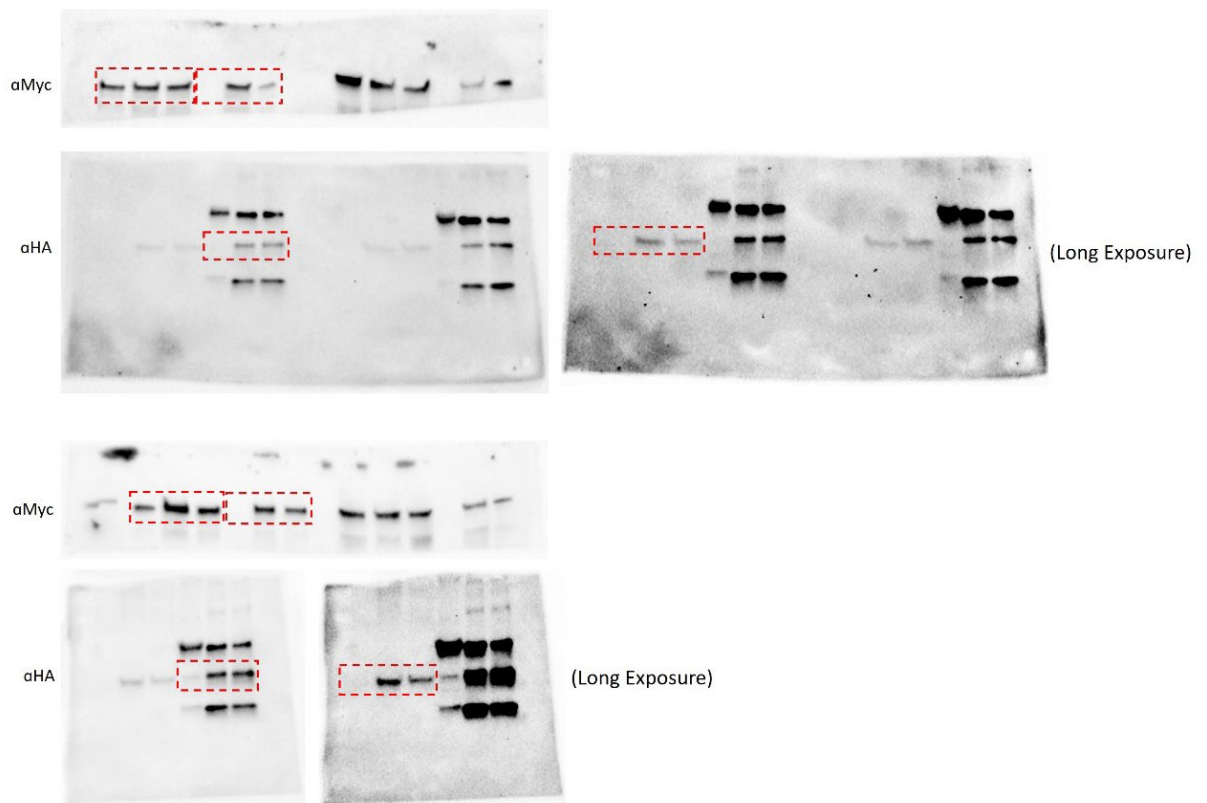

Red Rectangles Represent Area Used in Main Figures

Source data for Fig3f

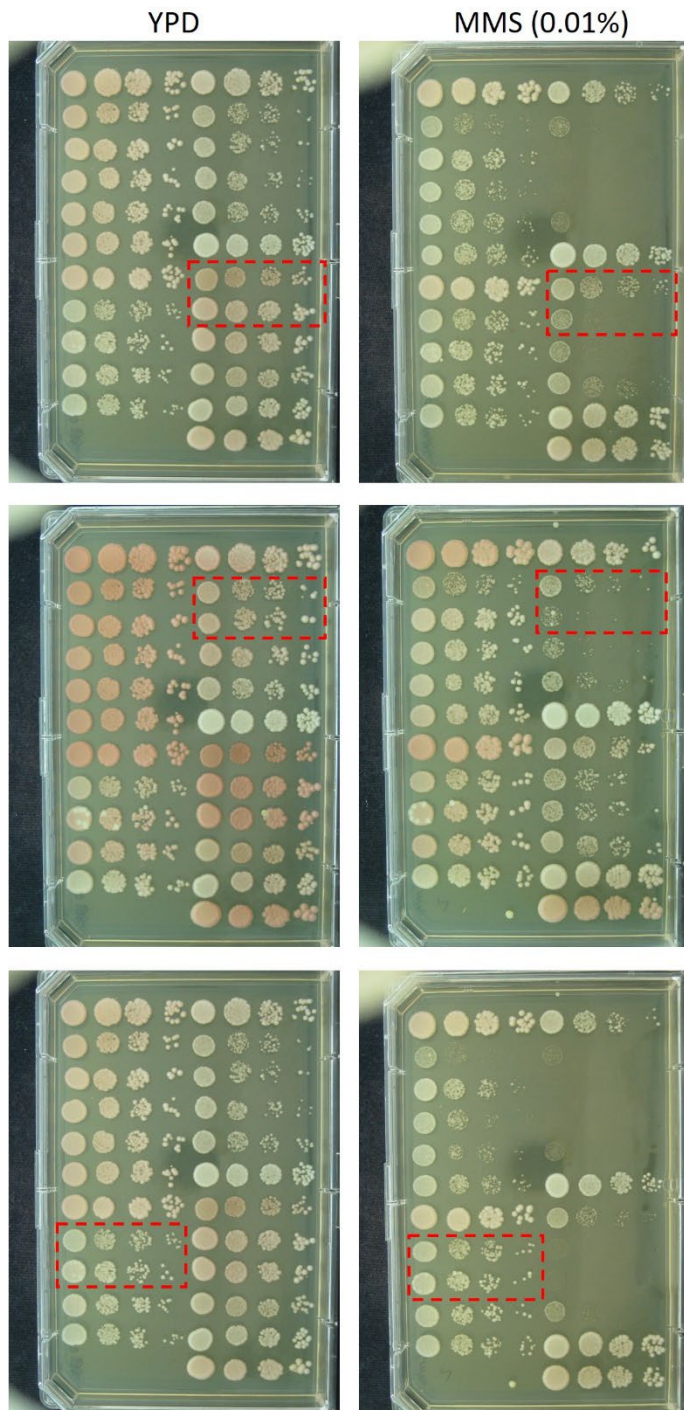

Red Rectangles Represent Area Used in Main Figures
